# Supplementary material for: Physiotherapy Interventions for Adults with Lower-Limb Amputation: Systematic Review of Effects on Quality of Life and Functional Outcomes
Source: Research Square preprint supplement (doi:10.21203/rs.3.rs-7434620/v1), 2025-09-08
Supplement: Supplementary file 1 [file 67df0e82c42041043bbc3b83.docx]

("Amputation"[Mesh] OR "Amputees"[Mesh] OR "lower-limb amputee*" OR "lower extremity amputation" OR "limb loss")

AND

("Physical Therapy Modalities"[Mesh] OR physiotherapy OR "exercise therapy"[Mesh] OR "rehabilitation"[Mesh] OR "gait training" OR "therapeutic exercise" OR "physical rehabilitation")

AND

("Quality of Life"[Mesh] OR "QoL" OR "Health-Related Quality of Life" OR "functional outcome*" OR "participation" OR "activities of daily living"[Mesh])
