# Supplementary figures and images for: Physiotherapy Interventions for Adults with Lower-Limb Amputation: Systematic Review of Effects on Quality of Life and Functional Outcomes
Source: Research Square preprint supplement (doi:10.21203/rs.3.rs-7434620/v1), 2025-09-08

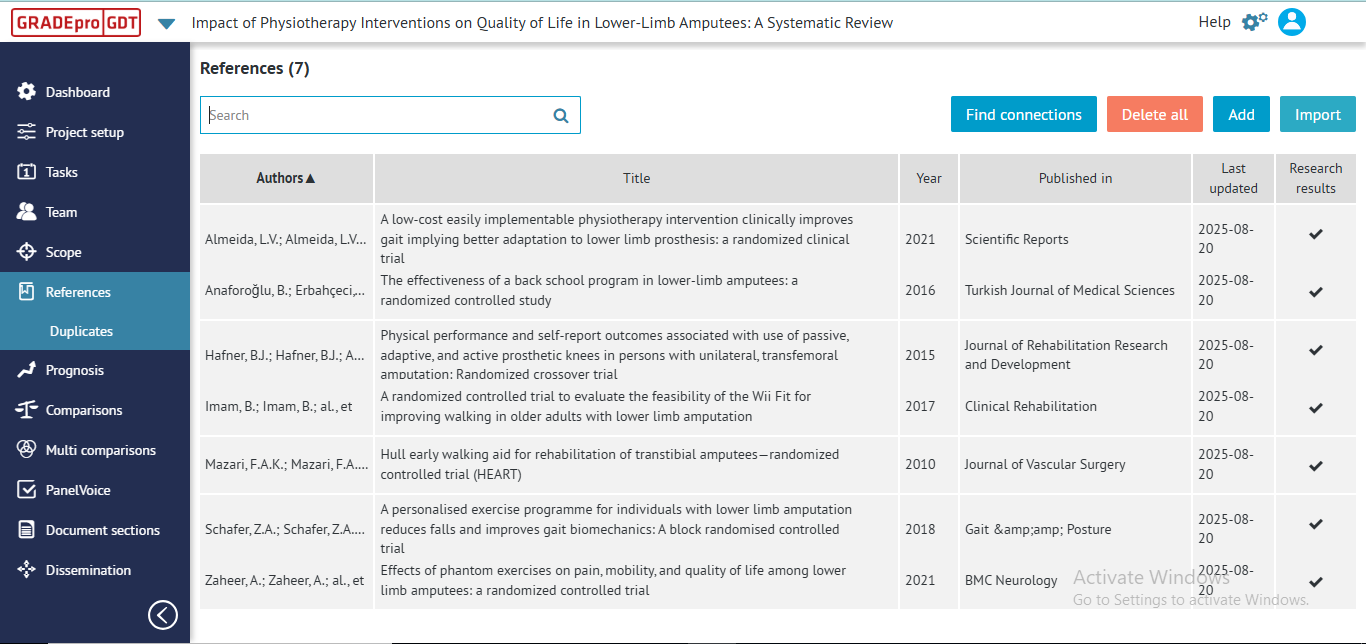


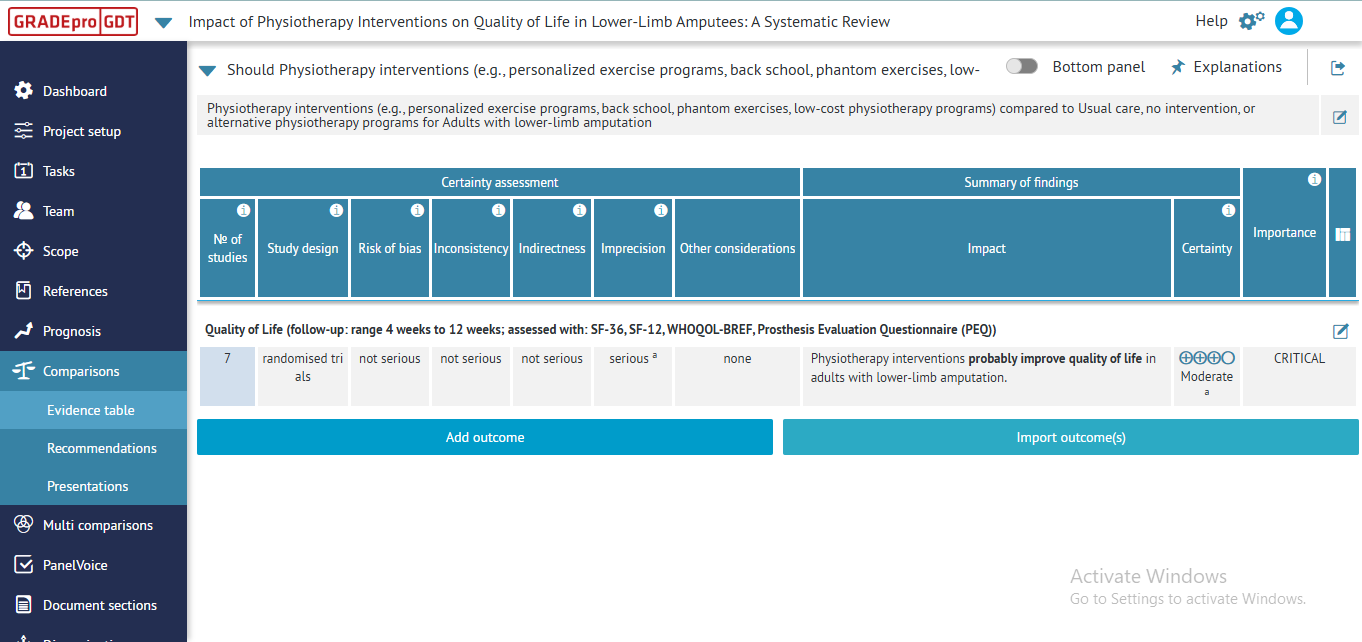

Supplement: Supplementary file 2 [file 741b1f53b04f48e14f9bed82.docx]
